# Supplementary material
Source: PubMed Central journal article supplement (PMC2935862)

## **Supplementary Material**

### **Figure legends**

#### **Figure S1**

**(a)** PCR of genomic DNA confirming excision by Cre recombinase of the floxed alleles in Fh1 deficient (Fh1  $-/-$ ) MEFs. **(b)** Immunoblot analysis confirming the loss of Fh1 protein in Fh1 $-/-$  MEFs.

#### **Figure S2**

Cartoon illustrating the strategy for generation of transgenes encoding either a full length or an FH sequence lacking the amino-terminal MTS (FH $\Delta$ MTS) by PCR.

Figure S1

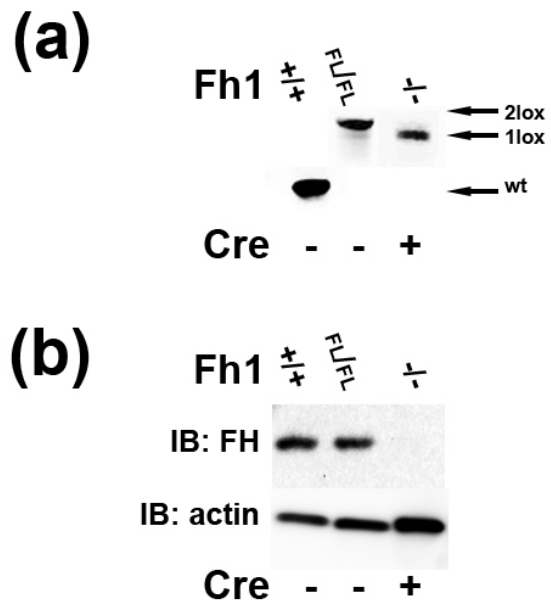

Figure S2

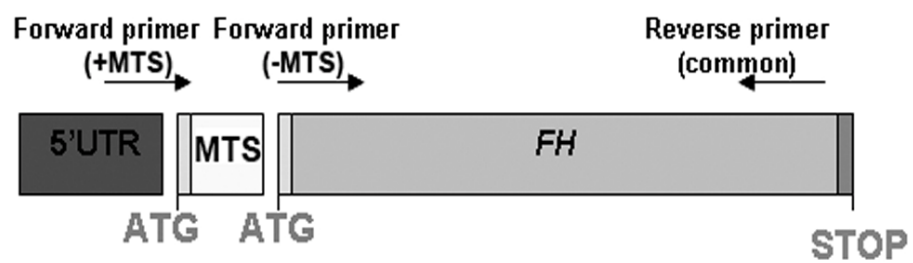

Supplement: supp_ddq305_ddq305supp.pdf [file supp_ddq305_ddq305supp.pdf]
